# Supplementary material for: A multiphoton transition activated iron based metal organic framework for synergistic therapy of photodynamic therapy/chemodynamic therapy/chemotherapy for orthotopic gliomas
Source: Royal Society of Chemistry journal article supplement (doi:10.1039/d2tb02273g), 2022-12-12
Supplement: d2tb02273g1.pdf [file d2tb02273g1.pdf]

## Supporting Information

# Multiphoton transition activated iron base-metal organic framework for synergistic therapy of photodynamic therapy/chemodynamic therapy/chemotherapy for orthotopic gliomas

*Zhijia Lv<sup>a, b</sup>, Yue Cao<sup>e</sup>, Dongzhi Xue<sup>a, c</sup>, Hao Zhang<sup>a, c</sup>, Shijie Zhou<sup>a, b</sup>, Na Yin<sup>a, c</sup>,*

*Wanying Li<sup>a, c</sup>, Longhai Jin<sup>f</sup>, Yinghui Wang<sup>a, c\*</sup>, Hongjie Zhang<sup>a, b, c, d\*</sup>*

<sup>a</sup> School of Rare Earths, University of Science and Technology of China, Hefei, Anhui, 230026, PR China

<sup>b</sup> Ganjiang Innovation Academy, Chinese Academy of Sciences, Ganzhou, Jiangxi, 341000, PR China

<sup>c</sup> State Key Laboratory of Rare Earth Resource Utilization, Changchun Institute of Applied Chemistry (CIAC), Chinese Academy of Sciences, Changchun, 130022, China

<sup>d</sup> Department of Chemistry, Tsinghua University, Beijing 100084, PR China

<sup>e</sup> Department of Neurosurgery, The First Hospital of Jilin University, Changchun 130041, PR China

<sup>f</sup> Department of Radiology, The Second Hospital of Jilin University, Changchun 130041, PR China

## **1. Materials**

The gadolinium chloride hexahydrate ( $\text{GdCl}_3 \cdot 6\text{H}_2\text{O}$ ), ytterbium chloride hexahydrate ( $\text{YbCl}_3 \cdot 6\text{H}_2\text{O}$ ), thulium chloride hexahydrate ( $\text{TmCl}_3 \cdot 6\text{H}_2\text{O}$ ), neodymium oxide ( $\text{Nd}_2\text{O}_3$ ), yttrium oxide ( $\text{Y}_2\text{O}_3$ ), Ytterbium oxide ( $\text{Yb}_2\text{O}_3$ ), oleic acid (OA), 1-octadecene (ODE), doxorubicin hydrochloride (Dox), 2-aminoterephthalic acid, trifluoroacetic acid and iron chloride hexahydrate ( $\text{FeCl}_3 \cdot 6\text{H}_2\text{O}$ ) were all obtained from Shanghai Aladdin Biochemical Technology Co., Ltd. Acetone, sodium hydroxide and ammonium fluoride were purchased from Xilong Scientific Co., Ltd. Cyclohexane was purchased from Tianjin Xinbote Chemical Co., Ltd. N,N-Dimethylformamide (DMF) was purchased from Tianjin Tiantai Chemical Co., Ltd. Polyvinyl pyrrolidone (MW: 40000) was purchased from Beijing Solarbio Technology Co., Ltd. Lactoferrin was purchased from Shanghai Yuanye Biotechnology Co., Ltd. The CCK-8 was bought from Changchun Sanbang Pharmaceutical Technology Co., Ltd. Calcein acetoxymethyl ester (Calcein AM) and propidium iodide (PI) were obtained from Sigma-Aldrich. 4',6-diamidino-2-phenylindole (DAPI) and fluorescein isothiocyanate isomer (FITC) were obtained from Shanghai Biyuntian Biotechnology Co., Ltd. Hydroxyphenyl fluorescein (HPF) was purchased from Shanghai Maokang Bio. Co., Ltd. Dihydroethidium (DHE) was purchased from Beijing Baiaolaibo Technology Co., Ltd. Mitochondrial Membrane Potential Assay Kit with JC-1 was purchased from Beyotime Biotechnology. The trans-well chamber (polycarbonate membrane, 0.4  $\mu\text{m}$  pore size) was obtained from Corning Biotechnology Co., LTD.

## **2. Experimental section**

## 2.1 Synthesis of OA-stabilized NaGdF<sub>4</sub>: Yb, Tm core nanoparticles

OA-stabilized NaGdF<sub>4</sub>: Yb, Tm core nanoparticles were synthesized according to the literature method. Typically, GdCl<sub>3</sub>•6H<sub>2</sub>O (0.5 mmol), YbCl<sub>3</sub>•6H<sub>2</sub>O (0.49 mmol) and TmCl<sub>3</sub>•6H<sub>2</sub>O (0.01 mmol) were mixed in a 100 mL three-necked flask charged with OA (7.0 mL) and ODE (15.0 mL). The mixture solution was heated to 160°C under argon atmosphere and kept for 30 min to obtain clear solution. After the solution was cooled to 50°C, a methanol solution (10 mL) of NH<sub>4</sub>F (4.0 mmol) and NaOH (2.5 mmol) was added and stirred at 50°C for 30 min. After methanol was evaporated at 100°C, the solution was heated to 300°C and kept for 60 min. Finally, the products were purified by centrifugation after addition of ethanol, washed several times with cyclohexane and ethanol, and finally re-dispersed in cyclohexane for further experiments.

## 2.2 Synthesis of RE(CF<sub>3</sub>COO)<sub>3</sub> (RE= Y, Nd and Yb)

The 10.0 mM RE<sub>2</sub>O<sub>3</sub> was dissolved in 5.0 mL deionized water and 5.0 mL trifluoroacetic acid mixed solution and kept stir for 12 h under the 105°C. After that, the clear solution is kept stirring and exposed to air until it becomes a dry powder. The dried powder was further dried in an oven at 80°C for 48 h, and the RE(CF<sub>3</sub>COO)<sub>3</sub> was obtained.

## 2.3 Synthesis of OA-stabilized core-shell structured NaGdF<sub>4</sub>: Yb, Tm@NaYF<sub>4</sub>: Yb, Nd nanoparticles

Briefly, as-prepared NaGdF<sub>4</sub>: Yb, Tm core NPs (1 mmol), CF<sub>3</sub>COONa (1.0 mmol), Y(CF<sub>3</sub>COO)<sub>3</sub> (0.6 mmol), Yb(CF<sub>3</sub>COO)<sub>3</sub> (0.1 mmol) and Nd(CF<sub>3</sub>COO)<sub>3</sub> (0.3 mmol)

were added to the mixture of OA (10.0 mL) and ODE (10.0 mL) in a three-necked flask at room temperature. The solution was heated to 100°C with magnetic stirring for 60 min. After that, the temperature was increased to 300°C and kept for 60 min under argon atmosphere. After the solution was cooled to room temperature, the final products were purified by centrifugation, and washed several times with cyclohexane and ethanol and finally re-dispersed in cyclohexane for further experiments.

#### **2.4 Synthesis of OA-stabilized core-shell-shell structured NaGdF<sub>4</sub>: Yb, Tm@NaYF<sub>4</sub>: Yb, Nd @ NaYF<sub>4</sub> nanoparticles (UCNPs)**

Briefly, as-prepared NaGdF<sub>4</sub>: Yb, Tm@NaYF<sub>4</sub>: Yb, Nd NPs, CF<sub>3</sub>COONa (1.0 mmol), Y(CF<sub>3</sub>COO)<sub>3</sub> (1.0 mmol) were added to the mixture of OA (10.0 mL) and ODE (10.0 mL) in a three-necked flask at room temperature. The solution was heated to 100°C with magnetic stirring for 60 min. After that, the temperature was increased to 300°C and kept for 60 min under argon atmosphere. After the solution was cooled to room temperature, the final products were purified by centrifugation, and washed several times with cyclohexane and ethanol and finally re-dispersed in 10.0 mL cyclohexane for further experiments.

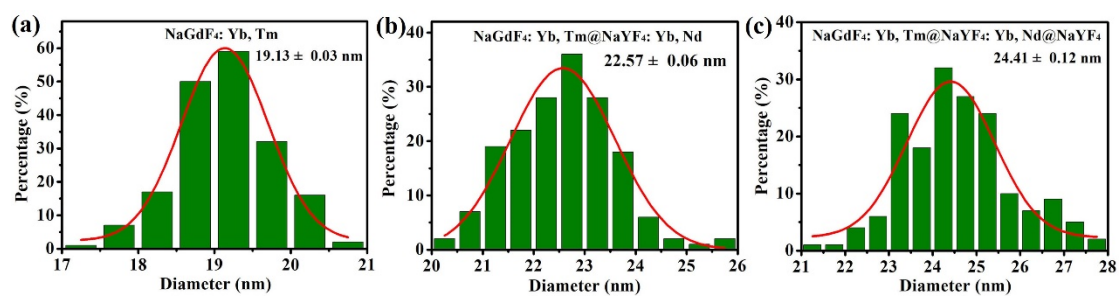

**Figure S1.** Histogram of particle size distribution of NaGdF<sub>4</sub>: Yb, Tm nanoparticles (a), NaGdF<sub>4</sub>: Yb, Tm@NaYF<sub>4</sub>: Yb, Nd nanoparticles (b) and NaGdF<sub>4</sub>: Yb, Tm@NaYF<sub>4</sub>: Yb, Nd@NaYF<sub>4</sub> nanoparticles (c).

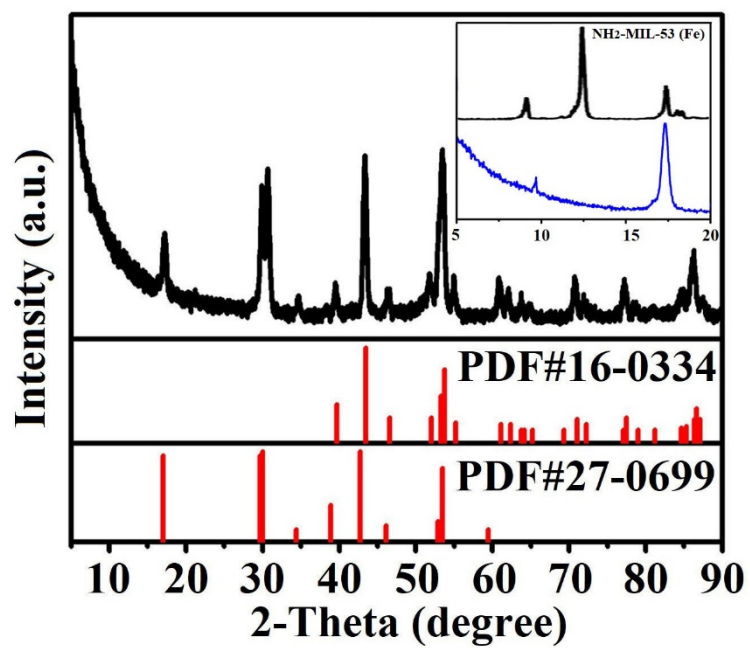

**Figure S2.** The XRD spectrum of UM (the illustration was a partial enlargement of the spectrum).

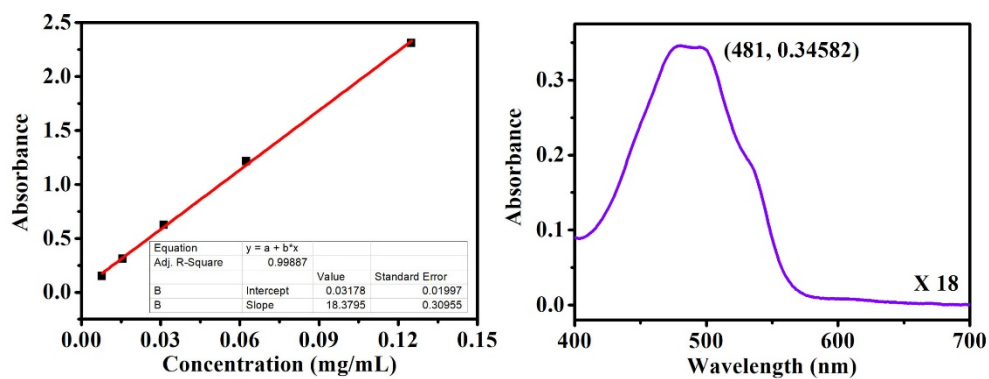

**Figure S3.** The UV-vis standard curve of Dox. (b) The UV-vis absorbance spectrum of UMD supernatant.

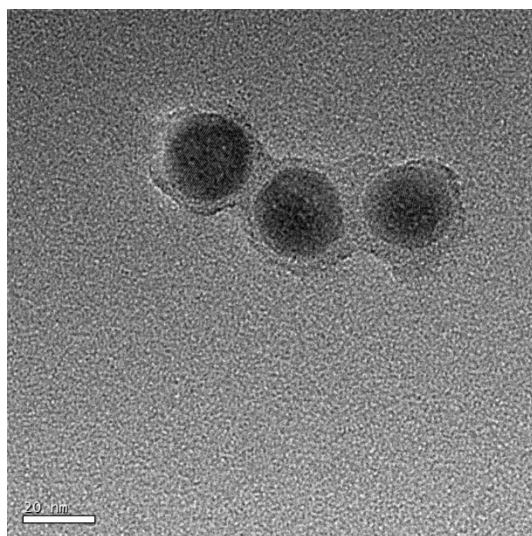

**Figure S4.** The TEM image of UMDL.



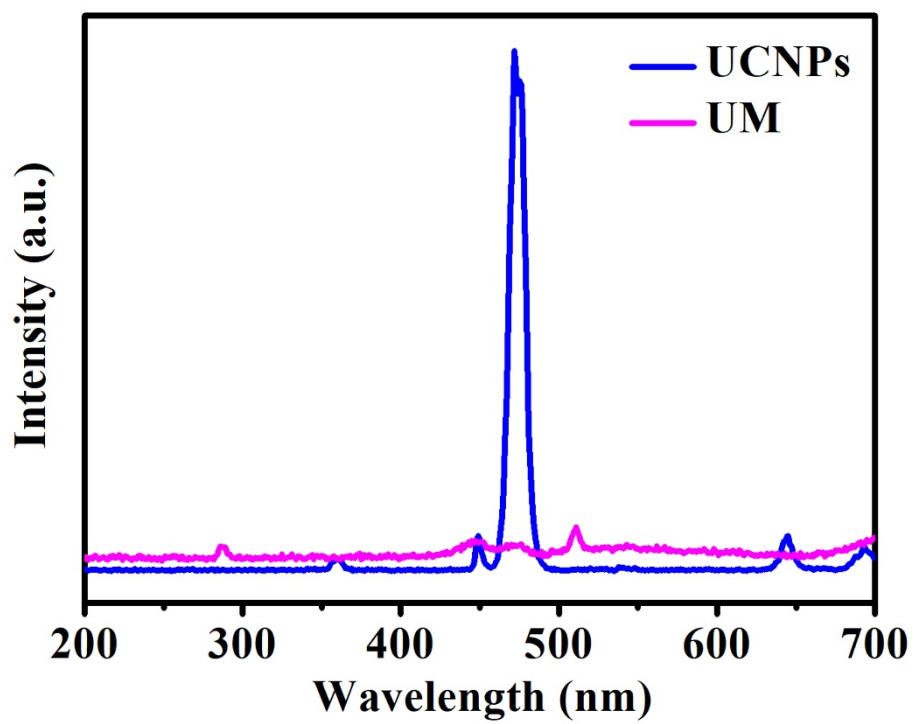

**Figure S5.** Up-conversion fluorescence spectra of UCNPs and UM, respectively.

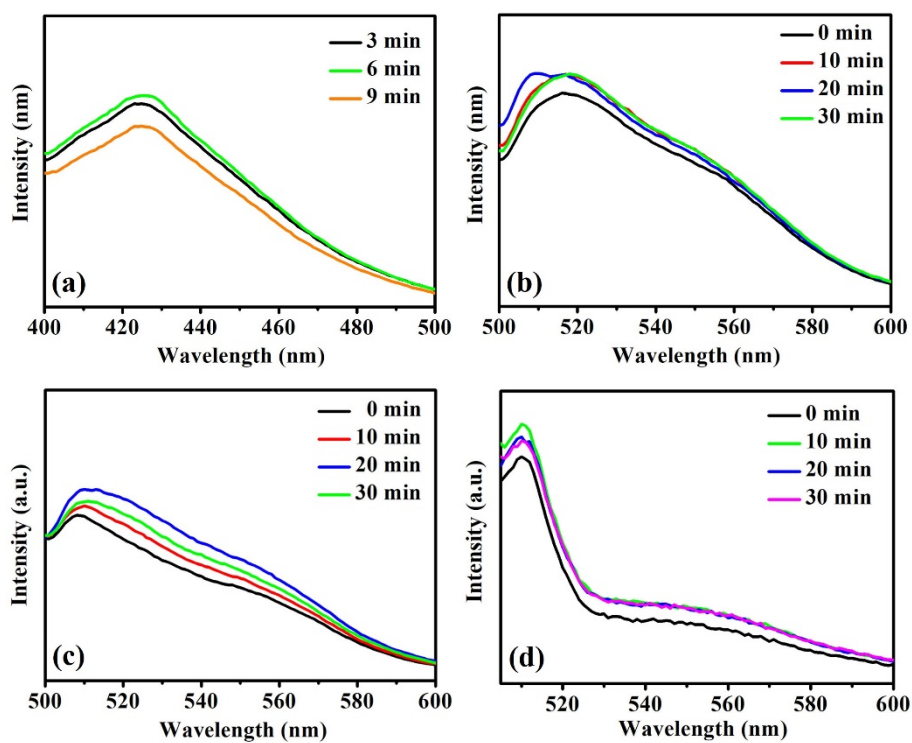

**Figure S6.** (a) The fluorescence spectra of 200 ppm UCNP by DHE probe to detect the generation of  $\cdot\text{O}_2^-$  under the 808 nm laser ( $1.0 \text{ W cm}^{-2}$ ). (b) The fluorescence spectra of 200 ppm UCNP by HPF probe to detect the generation of  $\cdot\text{OH}$  in the simulate TME solution without GSH. (c) The fluorescence spectra of 200 ppm UCNP by HPF probe to detect the generation of  $\cdot\text{OH}$  in the simulate TME solution. (d) Fluorescence spectra of 200 ppm UM by HPF probe in the simulate TME without GSH.

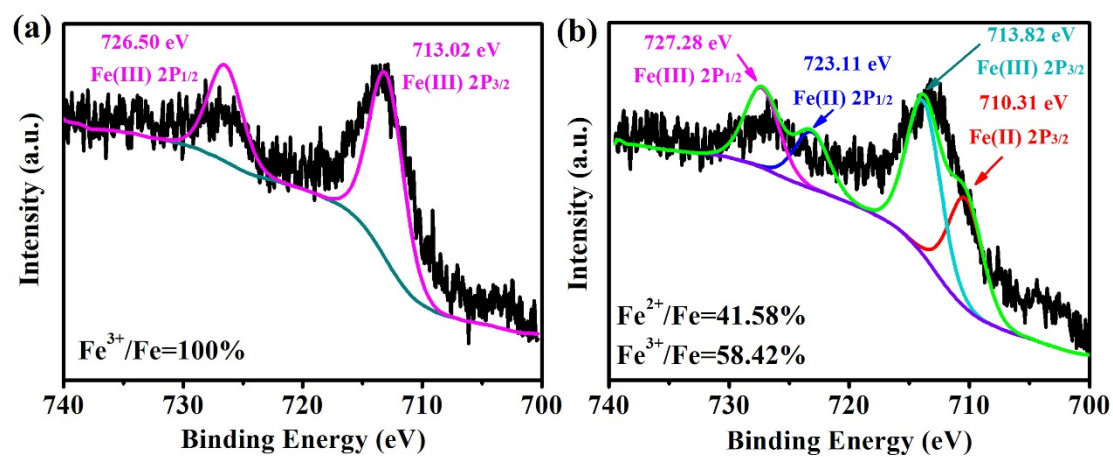

**Figure S7.** The XPS high-resolution spectra for Fe 2p characteristic peaks of UM (a) and UM reacted with 3 mM GSH for 4 h (b).

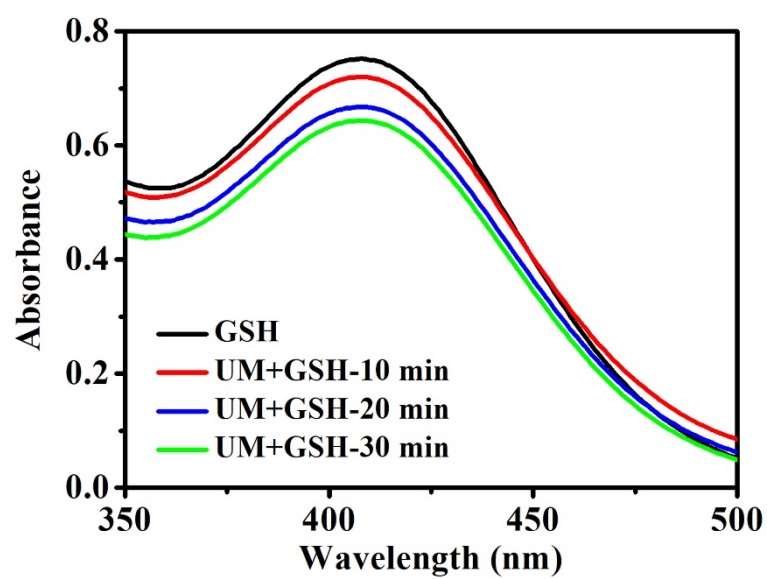

**Figure S8.** GSH residue detected by DTNB probe after 150 ppm UM consumed GSH for different times.

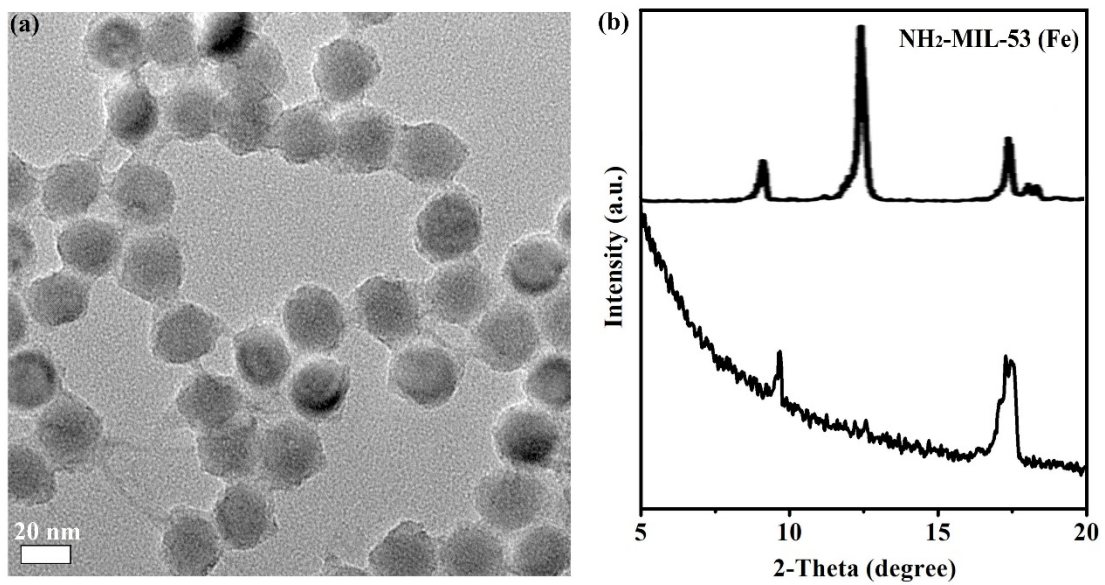

**Figure S9.** The TEM image and XRD pattern of UMDL dissolved in TME solution for 24 h.

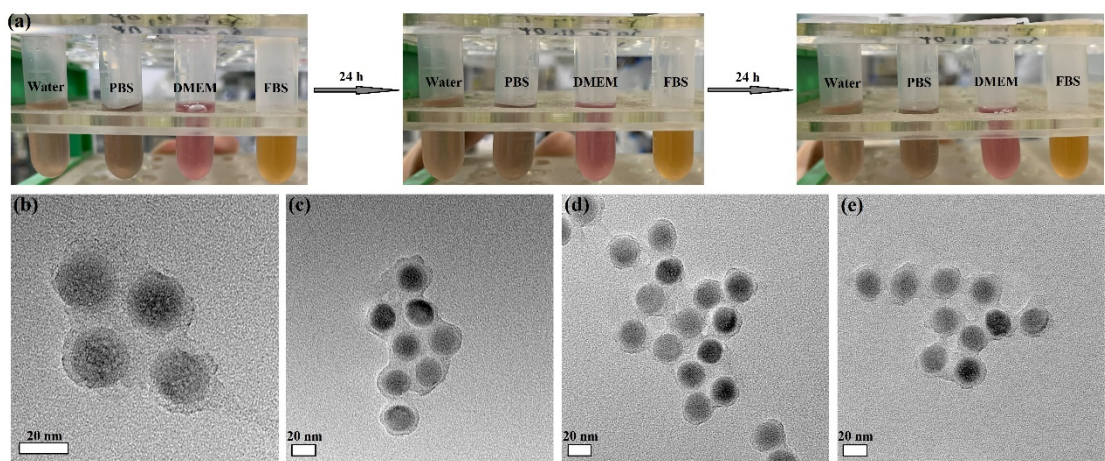

**Figure S10.** (a) The digital photographs of UMDL dispersed in water, PBS, dulbecco's modified eagle medium (DMEM) and fetal bovine serum (FBS) for 24 h and 48 h. The TEM images of UMDL nanoparticles after immersed in each solvent for 48 h, (b) water, (c) PBS, (d) DMEM and (e) FBS.

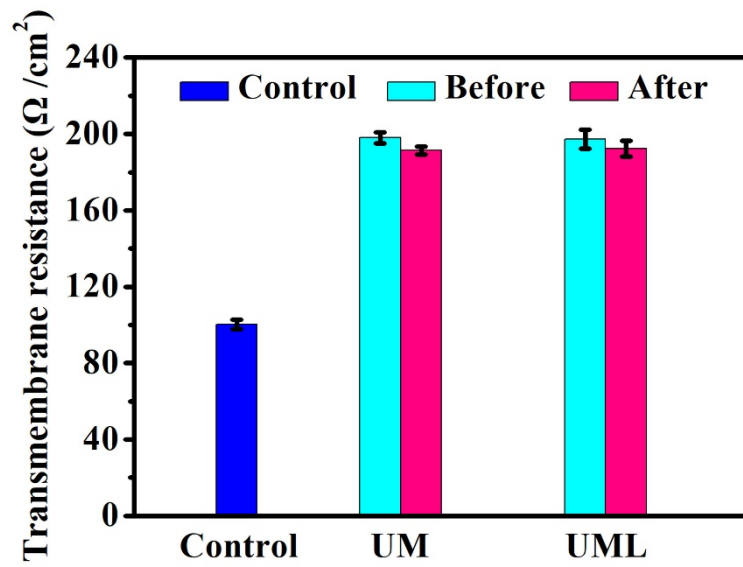

**Figure S11.** Trans-endothelial electrical resistance value before and after UM and UML NPs traversed the BBB model.

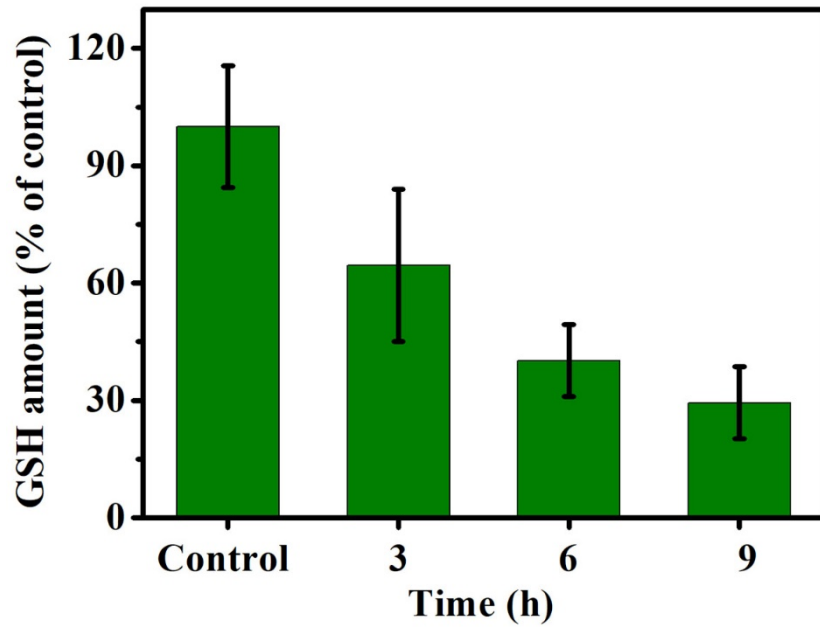

**Figure S12.** GSH content in GL261 cells after incubating with UML for different times.



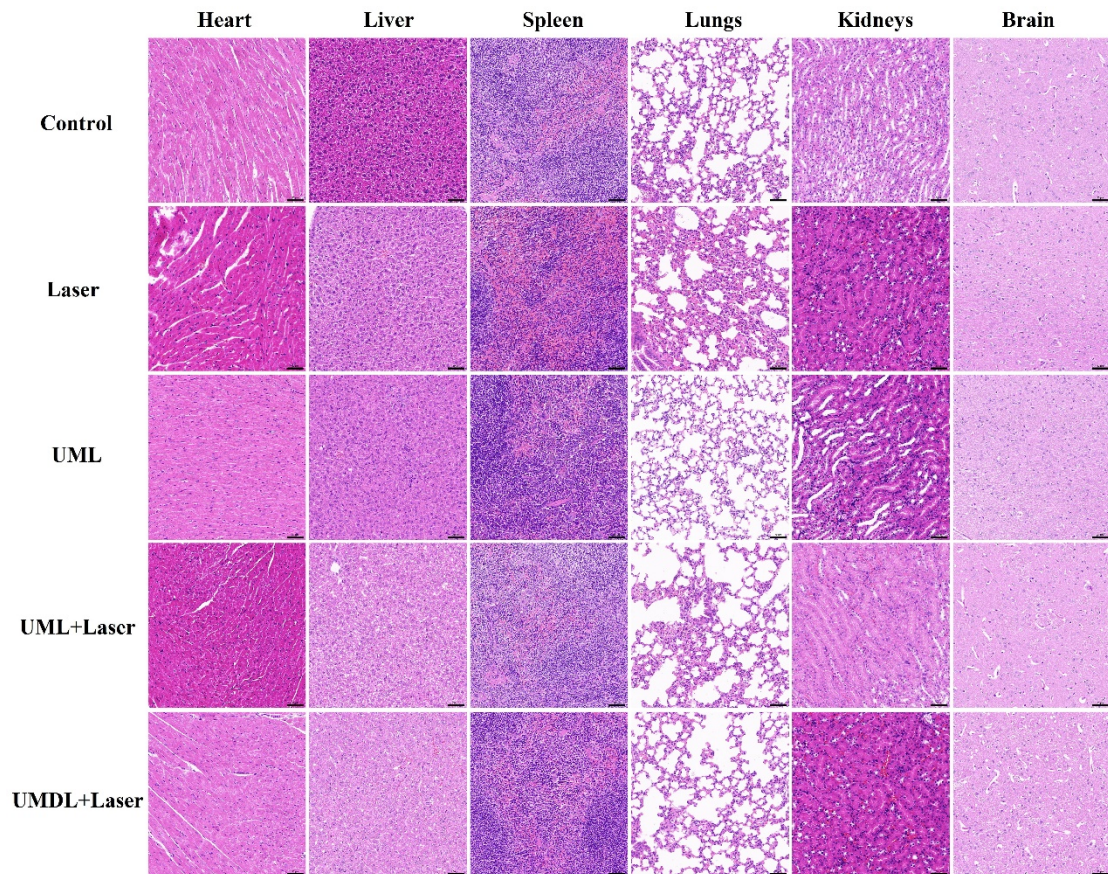

**Figure. S13** Hematoxylin-eosin (H&E) staining of the major organs (heart, liver, spleen, lung, kidney and brain) from different groups, scale bar: 50  $\mu$ m.

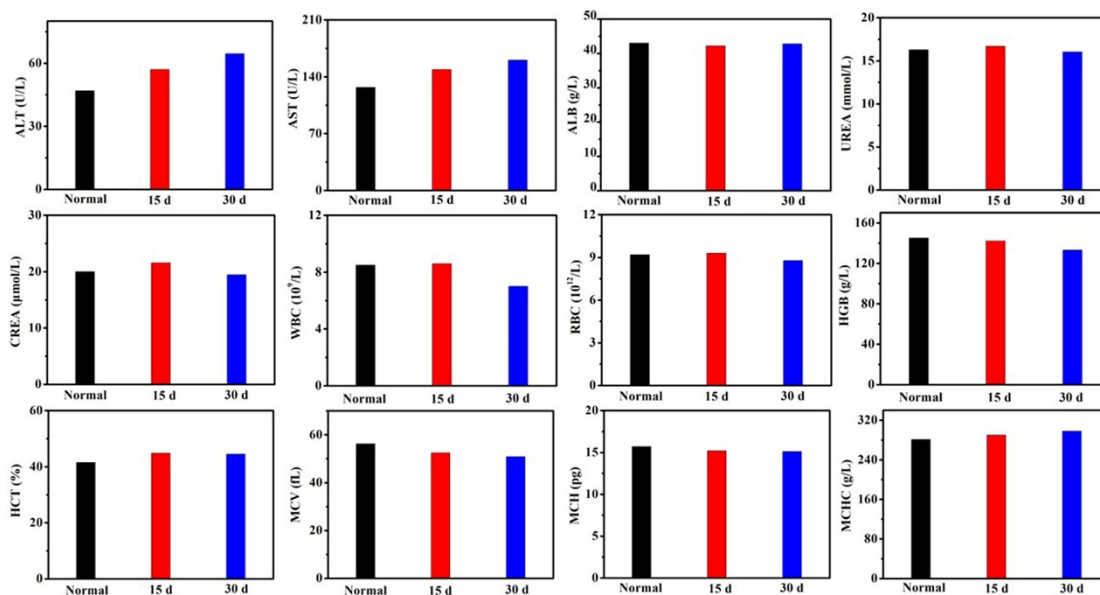

**Figure. S14** Blood biochemistry/complete blood panel analysis data after intravenous injected UMDL and collected at normal, 15 and 30 days post-injection C57BL/6J mice (alanine aminotransferase (ALT), alkaline phosphatase (ALP), aspartate aminotransferase (AST), urea (UREA), creatinine (CREA), white blood cells (WBC), red blood cells (RBC), hemoglobin (HGB), hematocrit (HCT), mean corpuscular volume (MCV), mean corpuscular hemoglobin (MCH) and mean corpuscular hemoglobin concentration (MCHC)).
